# Supplementary material for: A randomized controlled trial of pharmacist-led therapeutic carbohydrate and energy restriction in type 2 diabetes
Source: PubMed Central journal article supplement (PMC8433183; doi:10.1038/s41467-021-25667-4), 2021-09-10
Supplement: 41467_2021_25667_MOESM1_ESM.pdf [file 41467_2021_25667_MOESM1_ESM.pdf]

*Supplementary Information File*

**A randomized controlled trial of pharmacist-led therapeutic carbohydrate and energy restriction in type 2 diabetes**

\*To whom correspondence should be addressed:

Dr. Jonathan Little

School of Health and Exercise Sciences

University of British Columbia

Kelowna, BC V1V 1V7

CANADA

Ph: +1-250-807-9876

Email: [jonathan.little@ubc.ca](mailto:jonathan.little@ubc.ca)

Cody Durrer<sup>1</sup>, Sean McKelvey<sup>2</sup>, Joel Singer<sup>3</sup>, Alan M. Batterham<sup>4</sup>, James D. Johnson<sup>2,5</sup>, Kelsey Gudmundson<sup>1</sup>, Jay Wortman<sup>6</sup>, Jonathan P. Little<sup>\*1,2</sup>

1 School of Health and Exercise Sciences, University of British Columbia, Kelowna, BC CANADA

2 Institute for Personalized Therapeutic Nutrition, Vancouver, BC CANADA

3 School of Population and Public Health, University of British Columbia, Vancouver, BC CANADA

4 Centre for Rehabilitation, School of Health and Life Sciences, Teesside University, Middlesbrough, UNITED KINGDOM

5 Diabetes Research Group, Life Sciences Institute, Faculty of Medicine, University of British Columbia, Vancouver, BC CANADA

6 Faculty of Medicine, University of British Columbia, BC CANADA

Supplementary Table 1: Subgroup analyses of the primary outcome

|                         | Proportion (%)       | p value |
|-------------------------|----------------------|---------|
| Sex                     |                      |         |
| Male                    | 42.5 (25.3 to 57.1)  |         |
| Female                  | 33.3 (19.5 to 45.8)  |         |
| Difference              | 9.2 (-10.8 to 28.4)  | 0.37    |
| Insulin use at baseline |                      |         |
| Yes                     | 33.3 (14.7 to 49.7)  |         |
| No                      | 36.6 (25.4 to 46.9)  |         |
| Difference              | -3.3 (-23.9 to 17.6) | 0.76    |

Data are the proportion achieving the primary outcome within each subgroup and the corresponding difference in proportions with their respective 95% confidence intervals. Data were analyzed using a generalized linear model with a binomial distribution and logit link, with the Huber/White/sandwich variance estimator.

Supplementary Table 2: Treatment effect on HbA1c and Weight disaggregated by sex

|            | Treatment Effect       | p value |
|------------|------------------------|---------|
| HbA1c      |                        |         |
| Sex        |                        |         |
| Male       | -1.6 (-2.1 to -1.1)    |         |
| Female     | -1.2 (-1.7 to -0.7)    |         |
| Difference | -0.4 (-1.0 to 0.2)     | 0.21    |
| Weight     |                        |         |
| Sex        |                        |         |
| Male       | -14.0 (-16.0 to -12.0) |         |
| Female     | -10.5 (-12.3 to -8.6)  |         |
| Difference | -3.5 (-5.6 to -1.5)    | 0.0012  |

Data are treatment effect estimates in each subgroup (i.e., Male or Female) and the corresponding difference in treatment effect with their respective 95% confidence intervals. Data were analyzed using constrained baseline longitudinal analysis via linear mixed models

Supplementary Table 3: Glucose-lowering medication changes

| Medication Class | Deprescribed | Increased | Lowered | No Change | n  |
|------------------|--------------|-----------|---------|-----------|----|
| Pharm-TCR        |              |           |         |           |    |
| Insulin          | 56           | 0         | 44      | 0         | 27 |
| Sulfonylurea     | 84           | 0         | 10      | 6         | 31 |
| SGLT2 Inhibitor  | 92           | 0         | 8       | 0         | 13 |
| TZD              | 100          | 0         | 0       | 0         | 1  |
| DPP4 Inhibitor   | 87           | 0         | 7       | 7         | 15 |
| GLP1 Agonist     | 62           | 12        | 0       | 25        | 15 |
| Biguanide        | 36           | 1         | 25      | 38        | 78 |
| TAU              |              |           |         |           |    |
| Insulin          | 0            | 8         | 8       | 85        | 13 |
| Sulfonylurea     | 5            | 15        | 0       | 80        | 20 |
| SGLT2 Inhibitor  | 0            | 10        | 0       | 90        | 10 |
| TZD              | 0            | 0         | 0       | 100       | 1  |
| DPP4 Inhibitor   | 0            | 0         | 0       | 100       | 8  |
| GLP1 Agonist     | 0            | 9         | 0       | 91        | 11 |
| Biguanide        | 2            | 6         | 2       | 91        | 64 |

Medication changes are denoted as percentages of participants taking each respective medication at baseline. SGLT2: Sodium-glucose transport protein 2; TZD: Thiazolidinedione; DPP4: Dipeptidyl peptidase-4; GLP1: Glucagon-like peptide-1.

Supplementary Table 4: Blood pressure medication changes

| Medication Class         | Deprescribed | Increased | Lowered | No Change | n  |
|--------------------------|--------------|-----------|---------|-----------|----|
| Pharm-TCR                |              |           |         |           |    |
| ACE Inhibitors           | 11           | 8         | 25      | 56        | 36 |
| ARBs                     | 37           | 0         | 11      | 53        | 19 |
| Beta Blockers            | 25           | 0         | 25      | 50        | 8  |
| Calcium Channel Blockers | 11           | 6         | 17      | 67        | 18 |
| Diuretics                | 58           | 0         | 12      | 29        | 24 |
| Vasodilators             | 0            | 0         | 0       | 100       | 1  |
| TAU                      |              |           |         |           |    |
| ACE Inhibitors           | 0            | 0         | 0       | 100       | 23 |
| ARBs                     | 0            | 5         | 5       | 90        | 21 |
| Beta Blockers            | 0            | 10        | 0       | 90        | 10 |
| Calcium Channel Blockers | 0            | 0         | 0       | 100       | 14 |

Diuretics 0 0 0 100 20

Medication changes are denoted as percentages of participants taking each respective medication at baseline. ACE: Angiotensin-converting enzyme; ARB: Angiotensin II receptor blockers.

Supplementary Table 5: Macronutrient and kilocalorie intake at baseline, week 6, and week 12

|                  | Kilocalories | Kilojoules  | Carbohydrates (g) | Fats (g) | Protein (g) |
|------------------|--------------|-------------|-------------------|----------|-------------|
| <b>Pharm-TCR</b> |              |             |                   |          |             |
| Baseline         | 1789 (543)   | 7485 (2272) | 188 (72)          | 72 (29)  | 85 (30)     |
| Week 6           | 989 (217)    | 4138 (906)  | 69 (22)           | 34 (14)  | 106 (22)    |
| Week 12          | 984 (212)    | 4116 (885)  | 66 (20)           | 34 (15)  | 106 (23)    |
| <b>TAU</b>       |              |             |                   |          |             |
| Baseline         | 1806 (608)   | 7558 (2544) | 192 (80)          | 76 (32)  | 87 (28)     |
| Week 6           | 1714 (597)   | 7172 (2497) | 174 (71)          | 71 (37)  | 90 (28)     |
| Week 12          | 1667 (589)   | 6975 (2465) | 166 (85)          | 74 (45)  | 90 (28)     |

Data are daily means (SD). Descriptive data are based on complete cases of n=67 (Pharm-TCR) and n=53 (TAU).
